# Supplementary material
Source: PubMed Central journal article supplement (PMC4070437)
Supplement: NIHMS562153-supplement-1.pdf [file NIHMS562153-supplement-1.pdf]

1  
2  
3  
4  
5  
6  
7  
8  
9  
10  
11  
12  
13  
14  
15  
16  
17  
18  
19  
20  
21  
22  
23  
24  
25  
26  
27

## Supplementary Information

### **Real-time imaging of oxidative and nitrosative stress in the liver of live animals for drug-toxicity testing**

Adam J. Shuhendler<sup>1\*</sup>, Kanyi Pu<sup>1\*</sup>, Lina Cui<sup>1</sup>, Jack P. Uetrecht<sup>2</sup> & Jianghong Rao<sup>1</sup>

<sup>1</sup>*Molecular Imaging Program at Stanford, Department of Radiology, School of Medicine, Stanford University, Stanford, California 94305-5484, USA;*

<sup>2</sup>*Leslie Dan Faculty of Pharmacy, University of Toronto, Toronto, Ontario M5S 3M2, Canada*

*\*Both authors contributed equally to this work.*

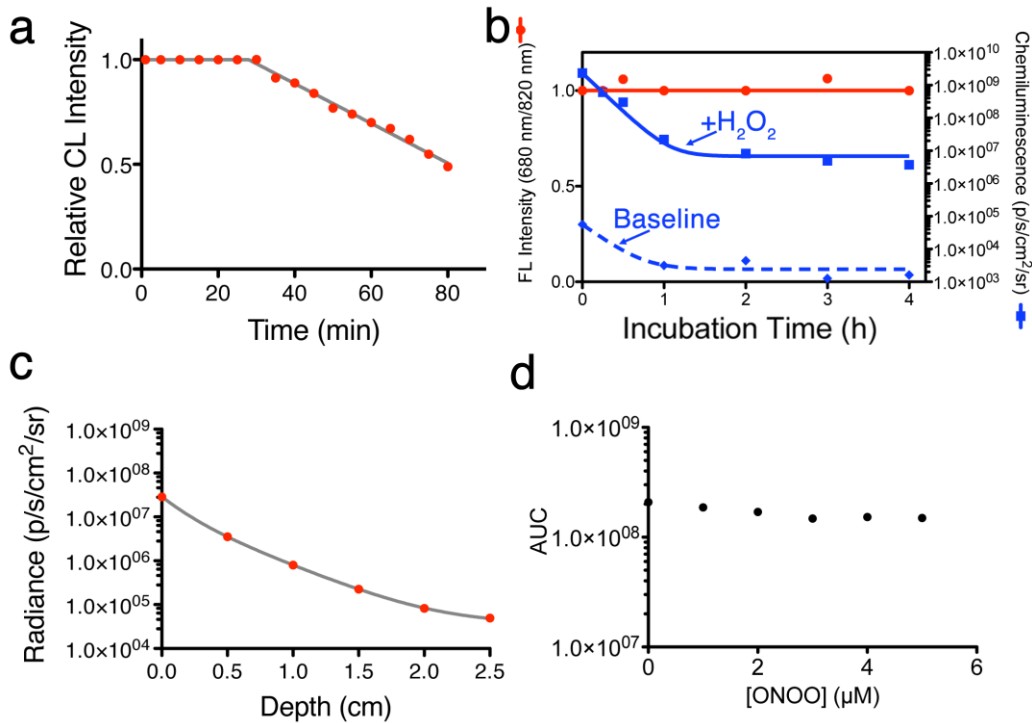

1

2 **Supplementary Figure S1.** Signal stability and imaging depth penetration for CF-SPN *in*  
 3 *vitro*. (a) The lifetime of chemiluminescent signal production from CF-SPN (5 μg/mL) in  
 4 1x PBS incubated with H<sub>2</sub>O<sub>2</sub> (50 mM). (b) Stability of the baseline fluorescence ratio  
 5 (red) and baseline chemiluminescence emission (dashed blue) upon incubation of CF-  
 6 SPN (5 μg/mL) in undiluted mouse serum at 37 °C. To demonstrate the prolonged  
 7 capacity for ROS detection, H<sub>2</sub>O<sub>2</sub> (6 μM) as added to CF-SPN incubations at indicated  
 8 times (solid blue). (c) Chemiluminescence imaging depth of penetration of CF-SPN (5  
 9 μg/mL) through a gelatin-hemoglobin-intralipid imaging phantom. (d) The total  
 10 chemiluminescence, as measured by area under the luminescence curve (AUC), from CF-  
 11 SPN after incubation with different concentrations of ONOO<sup>-</sup>.

12

13

14

15

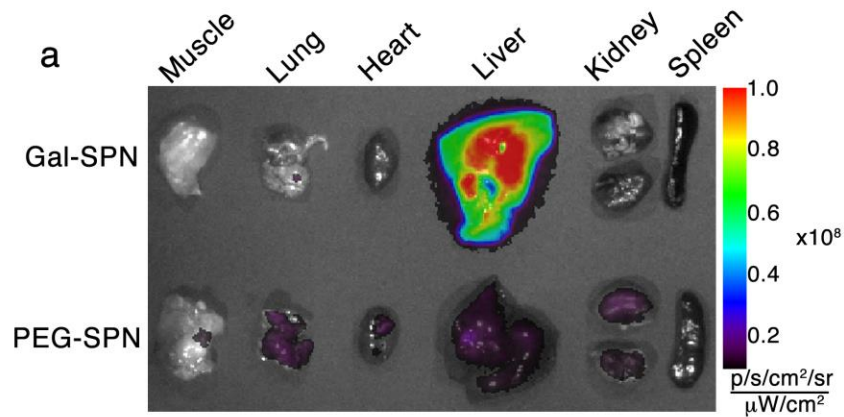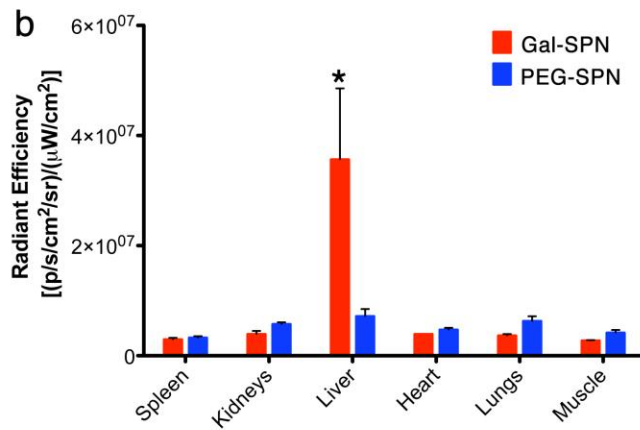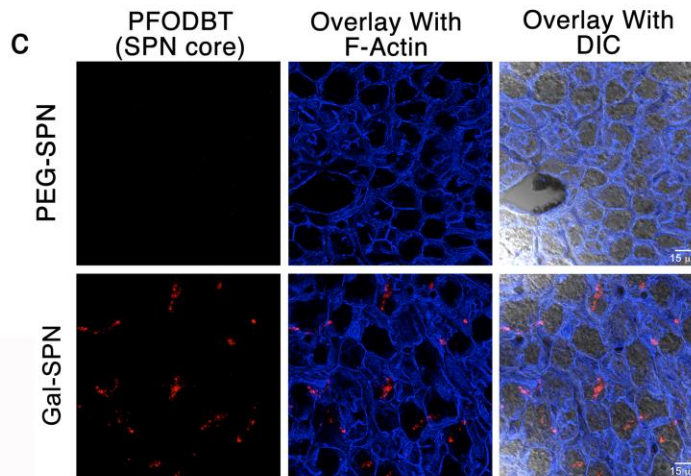

1

2 **Supplementary Figure S2.** Effective liver targeting through the conjugation of galactose  
 3 to the SPN surface. Nanoparticles composed of PFODBT and PS-*g*-PEG-Galactose (Gal-  
 4 SPN) or PS-*g*-PEG (PEG-SPN) were administered i.v. (0.8 mg each). Tissues were  
 5 excised and imaged 45 min after nanoparticle administration. (a) Representative image of  
 6 the biodistribution of Gal-SPN (top) and PEG-SPN (bottom). (b) Organ fluorescence  
 7 (ex/em=580/680 nm) was quantified and represented as the mean±s.d. (n=3). \* *p*<0.05  
 8 (Mann-Whitney U-test). (c) Uptake of untargeted SPN (top) and asialoglycoprotein

1 receptor-targeted Gal-SPN (bottom) 30 min following intravenous administration. Images  
2 are Z-projections averaged over 20 slices and a total z-depth of 7.7  $\mu\text{m}$ . Nanoprobe  
3 uptake was marked by fluorescence from the conjugated polymer core composed of  
4 PFODBT (red), and cellular boundaries were marked by staining of F-actin (blue).  
5 Fluorescence images were overlaid with DIC of the liver sections. Scale bars = 15  $\mu\text{m}$ .  
6  
7  
8

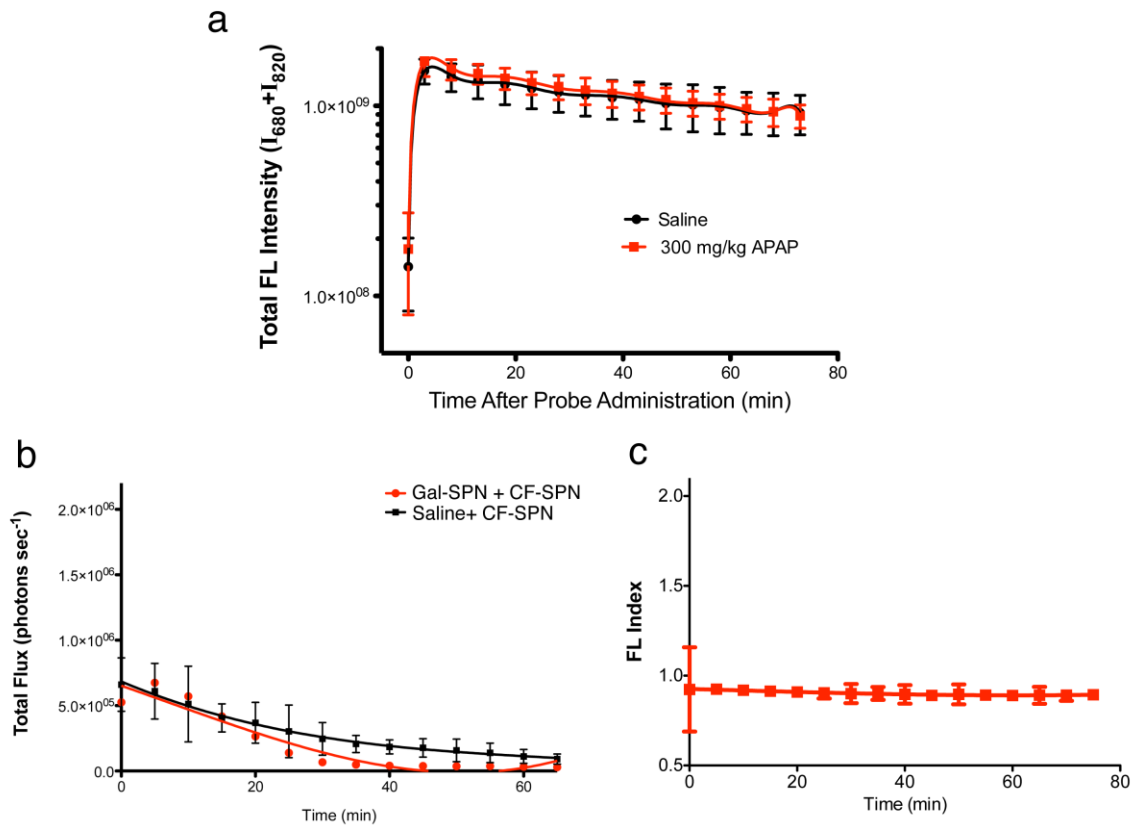

9

10 **Supplementary Figure S3.** (a) The uptake and retention of CF-SPN in the liver as  
11 measured by tracking total fluorescence intensity over time. Total fluorescence intensity  
12 is the sum of emission at 680 nm and at 820 nm ( $I_{680}+I_{820}$ ), which was measured for mice  
13 treated with saline (black curve) or with 300 mg/kg APAP (red curve). Data points  
14 represent the mean $\pm$ s.d. of 3 mice. (b & c) *In vivo* assessment of hepatotoxic potential of  
15 administered nanoparticles. The galactose-targeted nanoparticles (Gal-SPN, red circles)  
16 or saline (black squares) were administered i.v. 15 min prior to CF-SPN, and the  
17 chemiluminescence (b) and fluorescence index (c) was recorded. Data represents the  
18 mean $\pm$ s.d. of n=3 mice.

19

1

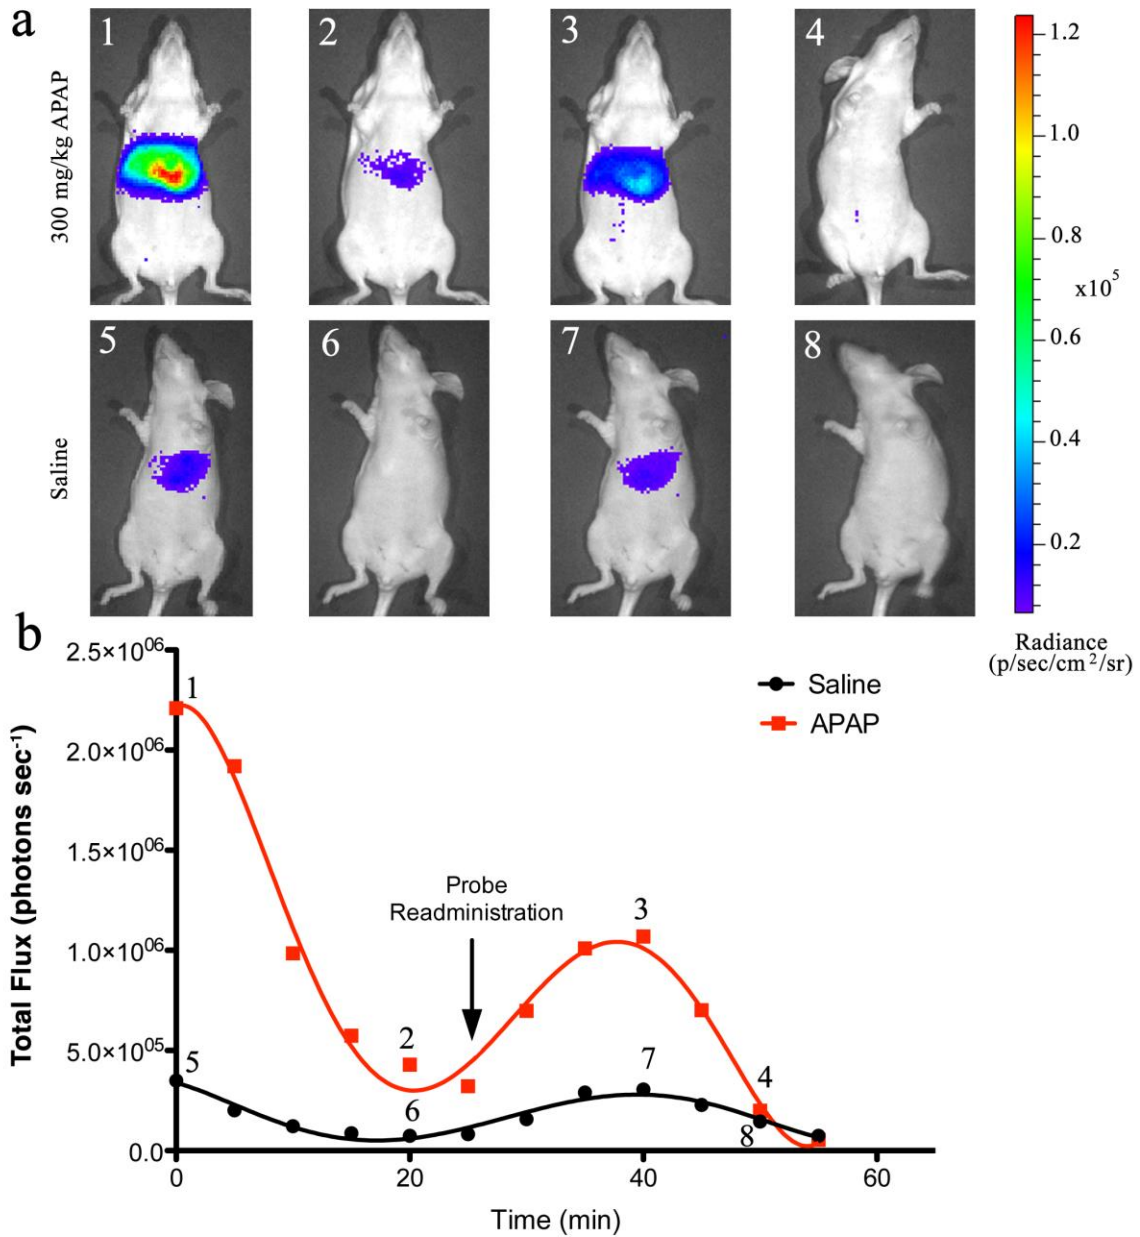

2

3 **Supplementary Figure S4.** Extension of the time course of H<sub>2</sub>O<sub>2</sub> detection after drug  
4 challenge by re-administration of CF-SPN. Mice were administered 300 mg/kg APAP  
5 (top row, 1-4) or saline (bottom row, 5-8) i.p., followed by the administration of 0.8 mg  
6 CF-SPN i.v. After 25 min, CF-NP was re-administered i.v. (a) Luminescence images and  
7 (b) quantitation of liver luminescence are shown. Black arrow in (b) indicates re-  
8 administration of CF-SPN. Numbers on images correspond to time points indicated on  
9 plot (n=1 mouse per group).

10

1

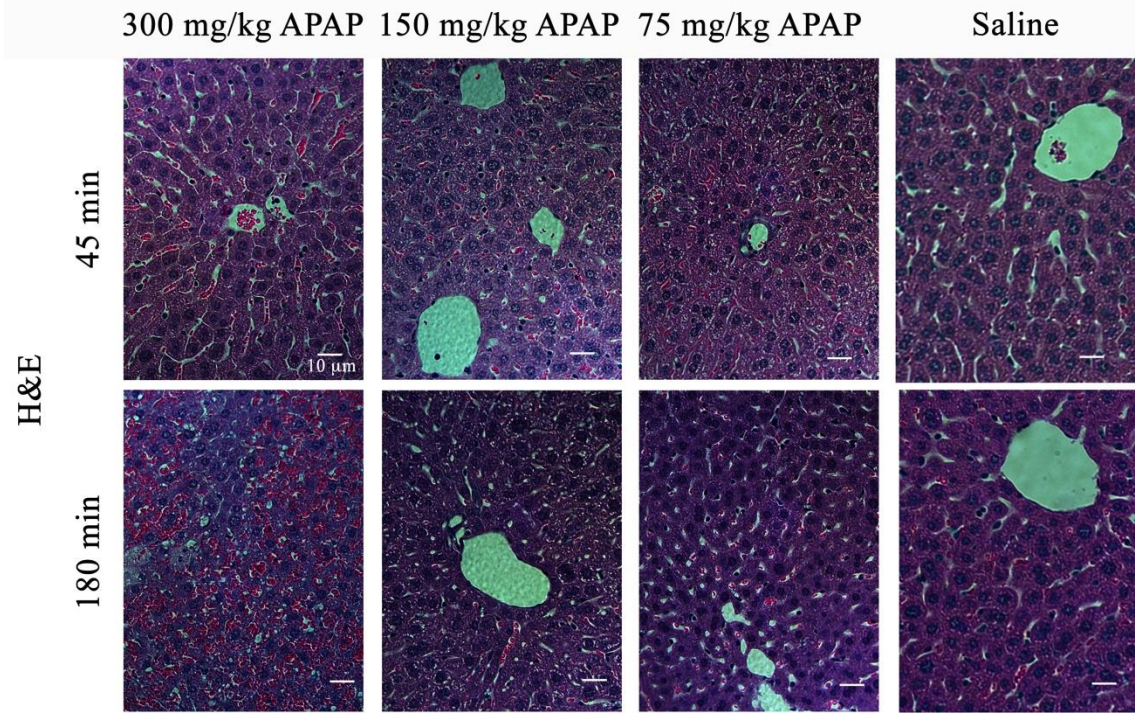

2

3 **Supplementary Figure S5.** Histological analysis of liver tissues. Mice were treated,  
4 from left to right, with 300, 150, 75 mg/kg APAP, or saline, and euthanized 45 min (top  
5 row) or 180 min (bottom row) after drug administration. Sections were stained with  
6 hematoxylin and eosin. Scale bar represents 10 μm.

7

8

9

10

11

12

13

14

15

16

17

1

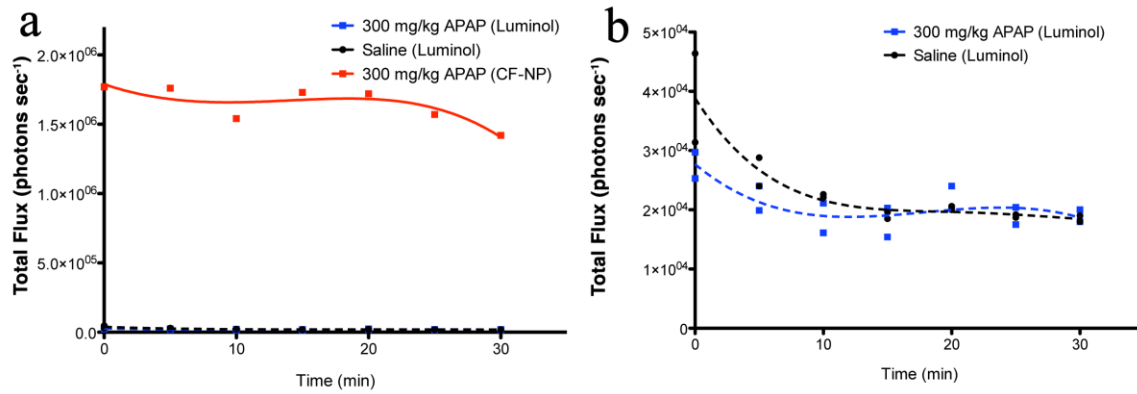

2

3 **Supplementary Figure S6.** Comparison between luminol and CF-SPN for their ability to  
4 detect drug-induced liver production of H<sub>2</sub>O<sub>2</sub>. Mice were administered 300 mg/kg APAP  
5 i.p., followed either by i.v. injection of 0.8 mg CF-SPN (containing 0.2 mg CPPO), or 0.2  
6 mg luminol. (a) Chemiluminescent signals from CF-SPN (red) or luminol with (dashed  
7 blue) or without (dashed black) APAP treatment are shown. (b) Rescaled y-axis of (a)  
8 showing the lack of any signal generation from luminol. Each group, n=1 mouse.

9

10

11

12

13

14

15

16

17

18

19

20
